# Supplementary material for: Developmental assessments during the first 5 years of life in infants fed breast milk, cow's milk formula, or soy formula
Source: PubMed Central journal article supplement (PMC7382202; doi:10.1002/fsn3.1630), 2020-05-13
Supplement: FSN3-8-3469-s002.pdf [file FSN3-8-3469-s002.pdf]

**Table, Supplemental Digital Content 1: Frequencies and Percentages of Developmental and Mental Health Disorders**

|                                  | <b>Breast</b> | <b>Milk</b> | <b>Soy</b> | <b>p-value</b> |
|----------------------------------|---------------|-------------|------------|----------------|
| ADHD                             | 1 (0.6)       | 4 (2.4)     | 3 (1.9)    | 0.369          |
| Autism                           | 0 (0.0)       | 1 (0.6)     | 2 (1.2)    | 0.213          |
| Behavioral or Emotional Disorder | 1 (0.6)       | 2 (1.2)     | 1 (0.6)    | 0.846          |
| Developmental Delay              | 1 (0.6)       | 2 (1.2)     | 2 (1.2)    | 0.747          |
| Sensory Disorder                 | 1 (0.6)       | 0 (0.0)     | 2 (1.2)    | 0.318          |
| Speech or Language Disorder      | 2 (1.2)       | 3 (1.8)     | 3 (1.9)    | 0.824          |
